# Supplementary material
Source: PubMed Central journal article supplement (PMC4035922)
Supplement: 1405204111_pnas.201405204SI.pdf [file 1405204111_pnas.201405204SI.pdf]

# Supporting Information

Zhang et al. 10.1073/pnas.1405204111

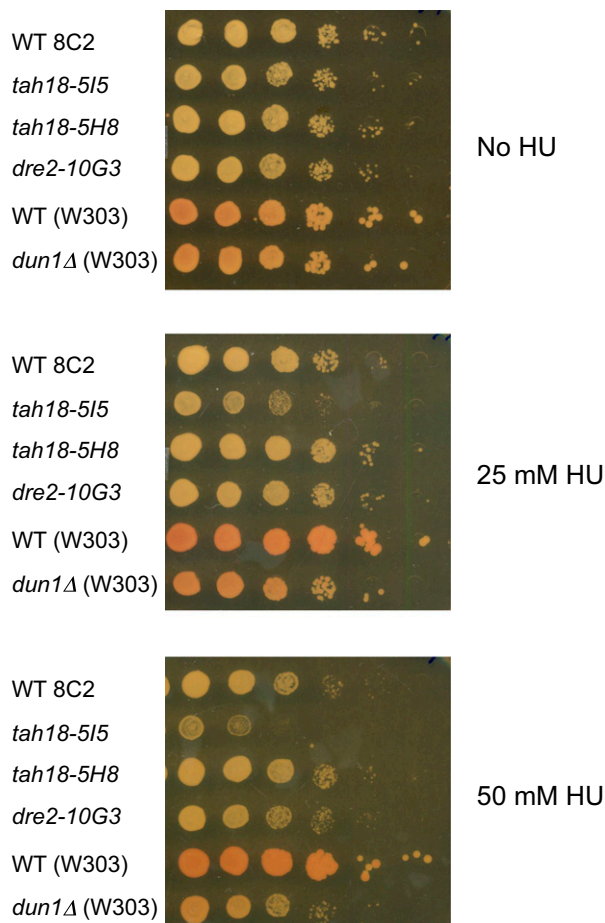

**Fig. S1.** The original *tah18-5I5* temperature-sensitive (*ts*) mutant is sensitive to hydroxyurea (HU). WT and mutant cells from log-phase cultures were dot-plated in 10-fold serial dilution, starting at  $10^6$  cells, on yeast extract/peptone/dextrose (YPD) plates or on YPD plates containing 25 mM or 50 mM HU and were incubated at 23 °C for 3 d before being imaged.

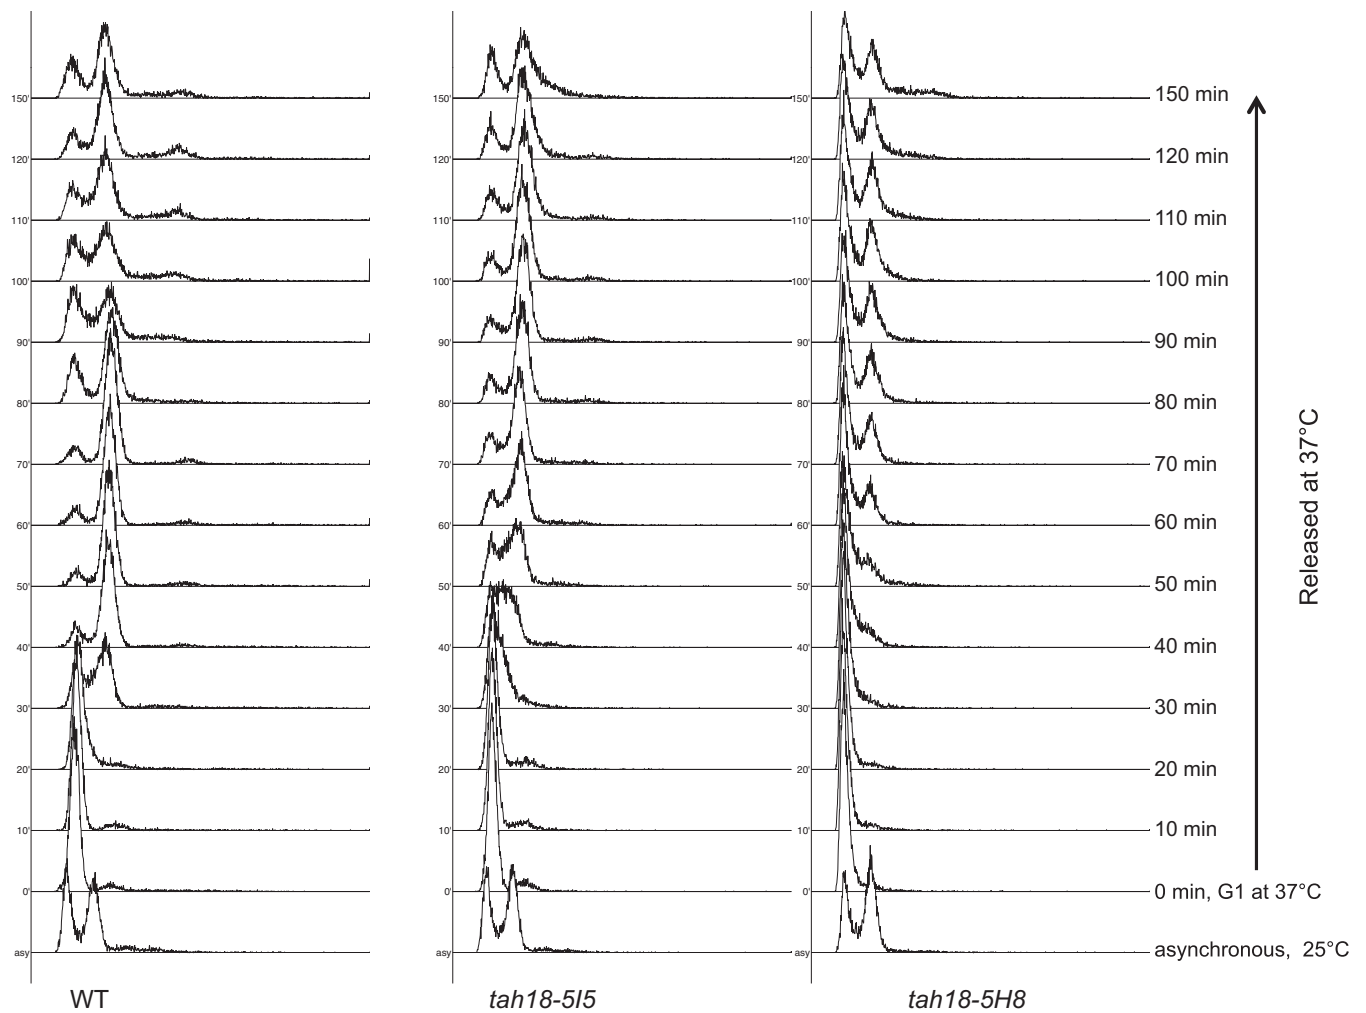

**Fig. S2.** Defects in cell-cycle progression in the original *tah18* ts mutant strains. WT, *tah18-5I5*, and *tah18-5H8* mutant cells from log-phase cultures were synchronized in G1 phase by  $\alpha$  factor-mediated arrest at 23 °C before being shifted to 37 °C for 1 h. Cells were released into the cell cycle by washing off the  $\alpha$  factor, and samples were taken at 10-min intervals and processed for flow cytometry.

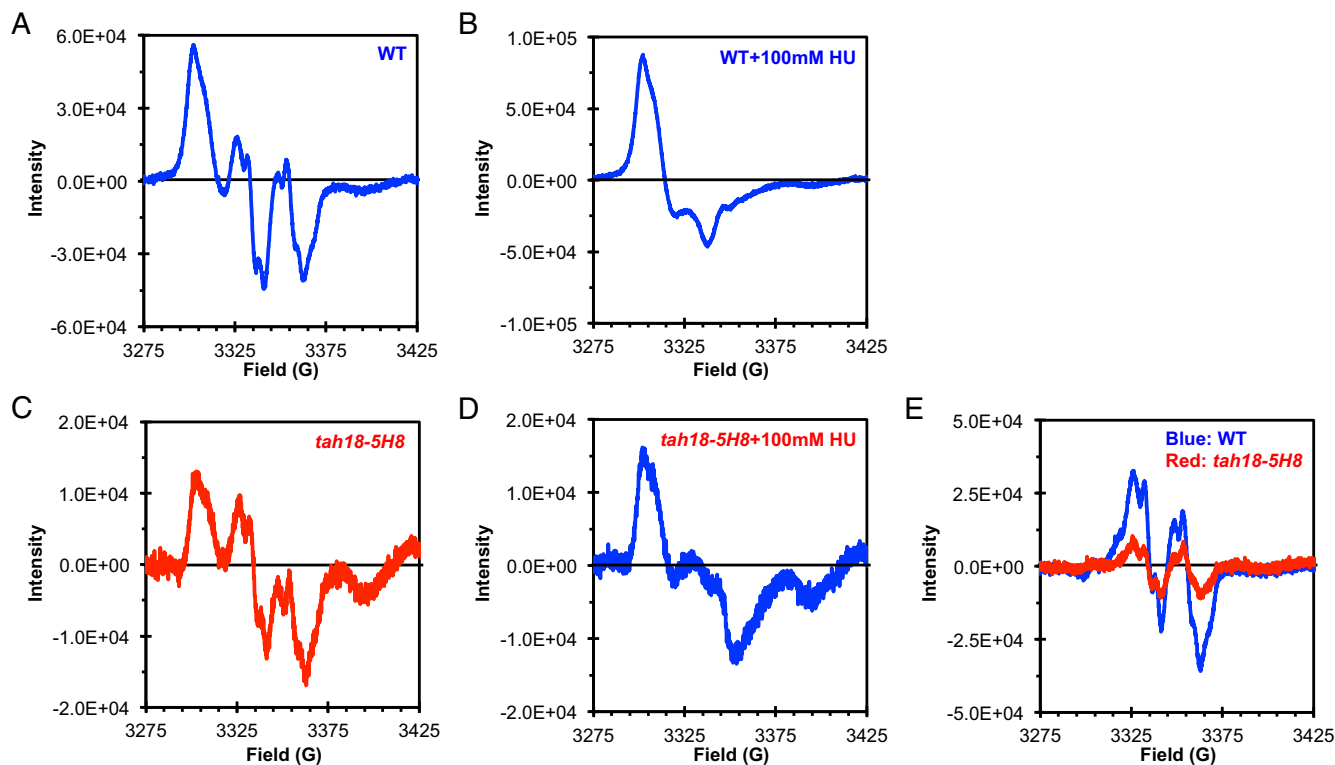

**Fig. S3.** Comparison of tyrosyl radical ( $Y\bullet$ ) content in the original *tah18-5H8* mutant and its isogenic WT strain. (A and B) EPR spectra of the WT cells without HU treatment (Left) or after incubation with 100 mM HU for 2 h (Right). (C and D) EPR spectra of the *tah18-5H8* cells without HU treatment (Left) or after incubation with 100 mM HU for 2 h (Right). (E) Comparison of WT (blue) and *tah18-5H8* (red) EPR signals after the HU-treated spectra were subtracted from the untreated spectra.

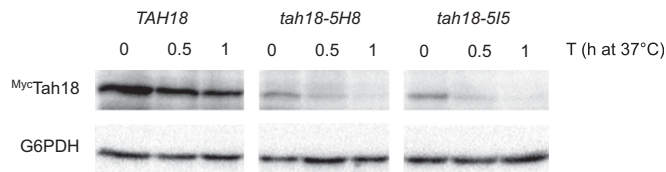

**Fig. S4.** Instability of the Tah18-ts mutant proteins at the nonpermissive temperature. The  $\Delta tah18$  mutant harboring a centromeric plasmid (one to three copies per cell) that expressed N-terminally Myc3-tagged *TAH18*, *tah18-5H8*, or *tah18-5I5* was grown at 23 °C to log phase and shifted to 37 °C at time 0. Cells were harvested at 0.5 and 1 h after temperature shift, and the Myc3-Tah18 protein levels were monitored by Western blotting with the 9E10 monoclonal anti-Myc antibody. G6PDH was probed on the same blot as a loading control.

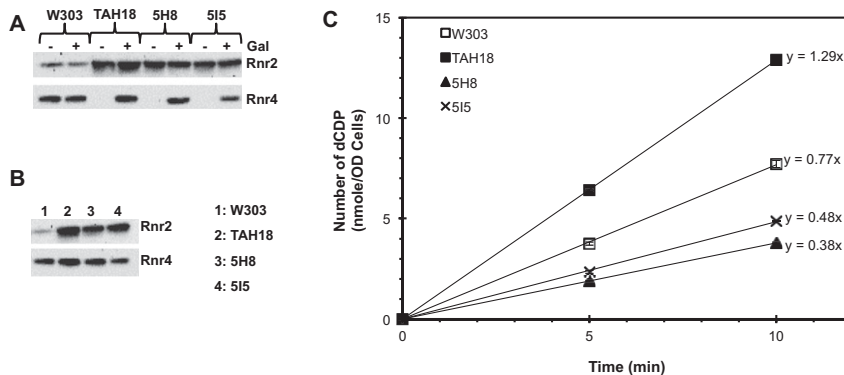

**Fig. S5.** Comparison of protein levels and activities of  $\beta\beta'$  in  $\Delta crt1 GalRNR4 TAH18$  and  $\Delta crt1 GalRNR4 tah18ts$  mutant cells before and after *GalRNR4* induction. (A) Comparison of Rnr2 ( $\beta$ ) and Rnr4 ( $\beta'$ ) protein levels in W303,  $\Delta crt1 GalRNR4 TAH18$  (*TAH18*),  $\Delta crt1 GalRNR4 tah18-5H8$  (*5H8*), and  $\Delta crt1 GalRNR4 tah18-5I5$  (*5I5*) cells before (-) and 2 h after (+)  $\beta'$  induction. (B) Comparison of  $\beta$  and  $\beta'$  protein levels at the 2-h time point after  $\beta'$  induction. (C) Assays of  $\beta\beta'$  activities at the 2-h time point after  $\beta'$  induction.

**Table S1. Yeast strains used in this study**

| Strain              | Genotype                                                                                                                  | Source     |
|---------------------|---------------------------------------------------------------------------------------------------------------------------|------------|
| BY4741              | <i>MATa his3Δ1 leu2Δ0 met15Δ0 ura3Δ0</i>                                                                                  | (1)        |
| BY4742              | <i>MATα his3Δ1 leu2Δ0 lys2Δ0 ura3Δ0</i>                                                                                   | (1)        |
| <i>GalRNR4</i>      | BY4741, <i>rnr4::HIS3MX6-P<sub>GAL1</sub>-RNR4</i>                                                                        | (2)        |
| <i>Δaft1</i>        | BY4741, <i>aft1::KanMX4</i>                                                                                               | EUROSCARF  |
| <i>Δaft2</i>        | BY4741, <i>aft2::KanMX4</i>                                                                                               | EUROSCARF  |
| <i>Δcrt1</i>        | BY4741, <i>crt1::KanMX4</i>                                                                                               | EUROSCARF  |
| <i>Δpmr1</i>        | BY4741, <i>pmr1::KanMX4</i>                                                                                               | EUROSCARF  |
| <i>Δdun1</i>        | BY4741, <i>dun1::KanMX4</i>                                                                                               | EUROSCARF  |
| <i>Δgrx3Δgrx4</i>   | BY4742, <i>grx3::LEU2 grx4::KanMX4</i>                                                                                    | (3)        |
| <i>GalDRE2Δcrt1</i> | BY4741, <i>dre2::HIS3-P<sub>GAL1</sub>-DRE2 crt1::KanMX4</i>                                                              | This study |
| SPY122              | BY4741, <i>cth1::KanMX4 cth2::HIS3MX4</i>                                                                                 | (4)        |
| AXY1171             | BY4741, <i>dre2::HIS3-P<sub>GAL1</sub>-DRE2</i>                                                                           | This study |
| AXY1195             | BY4742, <i>dre2::HIS3-P<sub>GAL1</sub>-DRE2 pmr1::KanMX4</i>                                                              | This study |
| AXY1493             | BY4741, <i>tah18::KanMX4 pMH1712</i> (pRS415- P <sub>TAH18</sub> -MYC3-TAH18)                                             | This study |
| AXY1494             | BY4741, <i>tah18::KanMX4 pMH1713</i> (pRS415- P <sub>TAH18</sub> -MYC3-tah18-5H8)                                         | This study |
| AXY1495             | BY4741, <i>tah18::KanMX4 pMH1714</i> (pRS415- P <sub>TAH18</sub> -MYC3-tah18-5I5)                                         | This study |
| AXY1542             | BY4741, <i>rnr4::HIS3MX6-P<sub>GAL1</sub>-RNR4, tah18::KanMX4 pMH1712</i><br>(pRS415- P <sub>TAH18</sub> -MYC3-TAH18)     | This study |
| AXY1543             | BY4741, <i>rnr4::HIS3MX6-P<sub>GAL1</sub>-RNR4, tah18::KanMX4 pMH1713</i><br>(pRS415- P <sub>TAH18</sub> -MYC3-tah18-5H8) | This study |
| AXY1544             | BY4741, <i>rnr4::HIS3MX6-P<sub>GAL1</sub>-RNR4, tah18::KanMX4 pMH1714</i><br>(pRS415- P <sub>TAH18</sub> -MYC3-tah18-5I5) | This study |
| AXY1664             | BY4741, <i>tah18::KanMX4::MYC3-TAH18-LEU2</i>                                                                             | This study |
| AXY1668             | BY4741, <i>tah18::KanMX4::MYC3-tah18-5H8-LEU2</i>                                                                         | This study |
| AXY1696             | BY4741, <i>tah18::KanMX4::MYC3-tah18-5I5-LEU2</i>                                                                         | This study |
| AXY1860             | BY4742, <i>dre2::HIS3-P<sub>GAL1</sub>-DRE2 cth1::KanMX4 cth2::HIS3MX4</i>                                                | This study |
| AXY2023             | BY4741, <i>dre2::HIS3-P<sub>GAL1</sub>-DRE2 aft2::KanMX4</i>                                                              | This study |
| AXY2026             | BY4741, <i>dre2::HIS3-P<sub>GAL1</sub>-DRE2 dun1::KanMX4</i>                                                              | This study |
| AXY2033             | BY4741, <i>dre2::HIS3-P<sub>GAL1</sub>-DRE2 aft1::KanMX4</i>                                                              | This study |
| AXY1767             | BY4741, <i>dre2::KanMX4, pMH1751</i> (pRS415-P <sub>DRE2</sub> -MYC3-DRE2)                                                | This study |
| Y300                | <i>MATa can1-100 ade2-1 his3-11,15 leu2-3,112 trp1-1 ura3-1</i>                                                           | (5)        |
| AXY1233             | Y300, <i>tah18-5H8</i>                                                                                                    | This study |
| AXY1235             | Y300, <i>tah18-5I5</i>                                                                                                    | This study |
| AXY1282             | Y300, <i>rnr4::HIS3MX6-P<sub>GAL1</sub>-RNR4</i>                                                                          | This study |
| AXY1313             | Y300, <i>rnr4::HIS3MX6-P<sub>GAL1</sub>-RNR4 tah18-5H8</i>                                                                | This study |
| AXY1317             | Y300, <i>rnr4::HIS3MX6-P<sub>GAL1</sub>-RNR4 tah18-5I5</i>                                                                | This study |
| AXY1914             | Y300, <i>HIS3-P<sub>GAL1</sub>-RNR4 crt1::LEU2</i>                                                                        | This study |
| AXY1916             | Y300, <i>HIS3-P<sub>GAL1</sub>-RNR4 crt1::LEU2 tah18-5H8</i>                                                              | This study |
| AXY1918             | Y300, <i>HIS3-P<sub>GAL1</sub>-RNR4 crt1::LEU2 tah18-5I5</i>                                                              | This study |
| MHY340              | Y300, <i>rnr2::KanMX6-P<sub>RNR2</sub>-MYC3-RNR2</i>                                                                      | This study |

- Brachmann CB, et al. (1998) Designer deletion strains derived from *Saccharomyces cerevisiae* S288C: A useful set of strains and plasmids for PCR-mediated gene disruption and other applications. *Yeast* 14(2):115–132.
- Zhang Y, et al. (2011) Investigation of in vivo diferric tyrosyl radical formation in *Saccharomyces cerevisiae* Rnr2 protein: Requirement of Rnr4 and contribution of Grx3/4 AND Dre2 proteins. *J Biol Chem* 286(48):41499–41509.
- Mühlenhoff U, et al. (2010) Cytosolic monothiol glutaredoxins function in intracellular iron sensing and trafficking via their bound iron-sulfur cluster. *Cell Metab* 12(4):373–385.
- Puig S, Askeland E, Thiele DJ (2005) Coordinated remodeling of cellular metabolism during iron deficiency through targeted mRNA degradation. *Cell* 120(1):99–110.
- Allen JB, Zhou Z, Siede W, Friedberg EC, Elledge SJ (1994) The SAD1/RAD53 protein kinase controls multiple checkpoints and DNA damage-induced transcription in yeast. *Genes Dev* 8(20):2401–2415.

**Table S2. Plasmids used in this study**

| Plasmid | Description                               | Source     |
|---------|-------------------------------------------|------------|
| pMH1763 | pRS415-P <sub>DIF1</sub> -MYC3-DIF1       | This study |
| pMH1712 | pRS415-P <sub>TAH18</sub> -MYC3-TAH18     | This study |
| pMH1713 | pRS415-P <sub>TAH18</sub> -MYC3-tah18-5H8 | This study |
| pMH1714 | pRS415-P <sub>TAH18</sub> -MYC3-tah18-5I5 | This study |
| pMH1751 | pRS415-P <sub>DRE2</sub> -MYC3-DRE2       | This study |
